# Supplementary material for: A dipeptidyl peptidase IV inhibitory peptide relieves palmitic acid-induced endoplasmic reticulum stress in HepG2 cells independent of inhibiting dipeptidyl peptidase IV activity
Source: Royal Society of Chemistry journal article supplement (doi:10.1039/d1fo02283k), 2021-01-01
Supplement: d1fo02283k1.pdf [file d1fo02283k1.pdf]

Table S1. Sequences of the primers used for evaluation of the relative mRNA expression levels by

| RT-PCR         |                      |                       |
|----------------|----------------------|-----------------------|
| Gene           | Forward              | Reverse               |
| $\beta$ -actin | ACCCAGCCATGTACGTAGC  | GTGTGGGTTACCCCGTCTC   |
| DPP-IV         | GGCACCTGGGAAGTCATCGG | CCGGATTCAGCTCAACTGAGG |
|                | G                    | C                     |

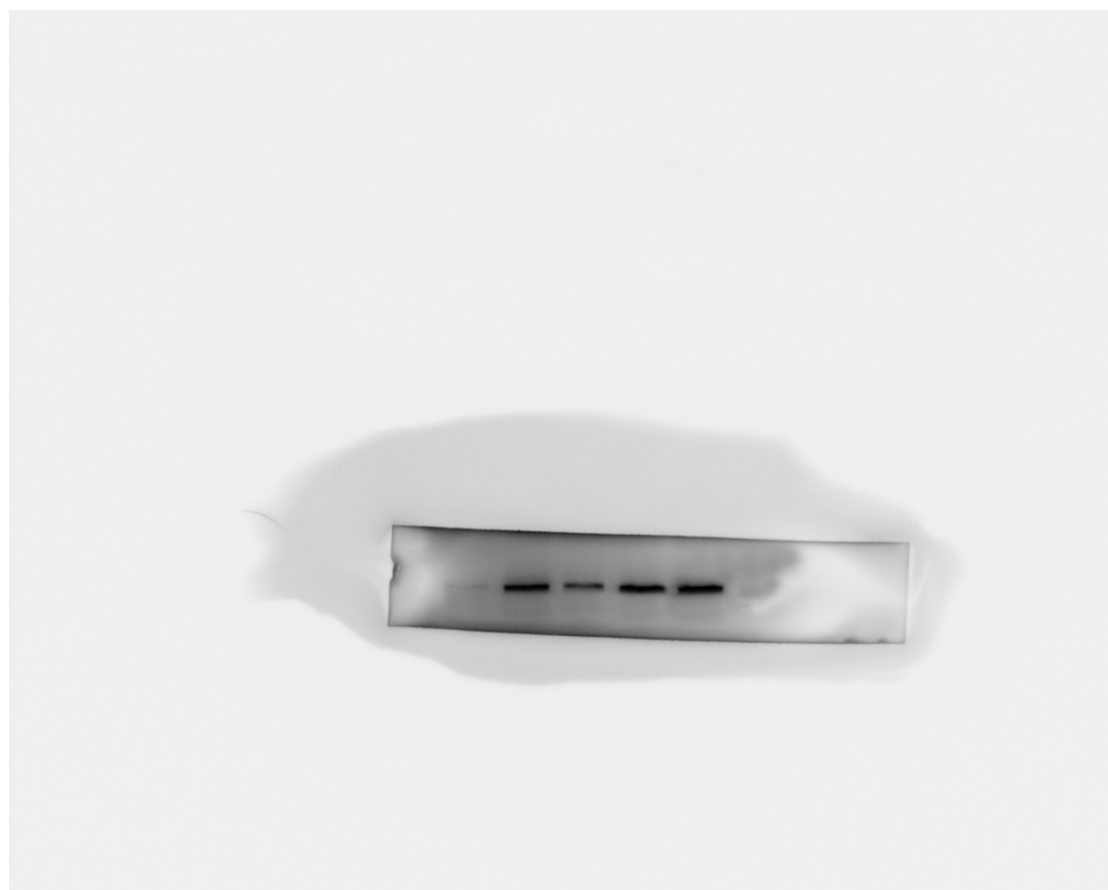

Cleaved caspase-3

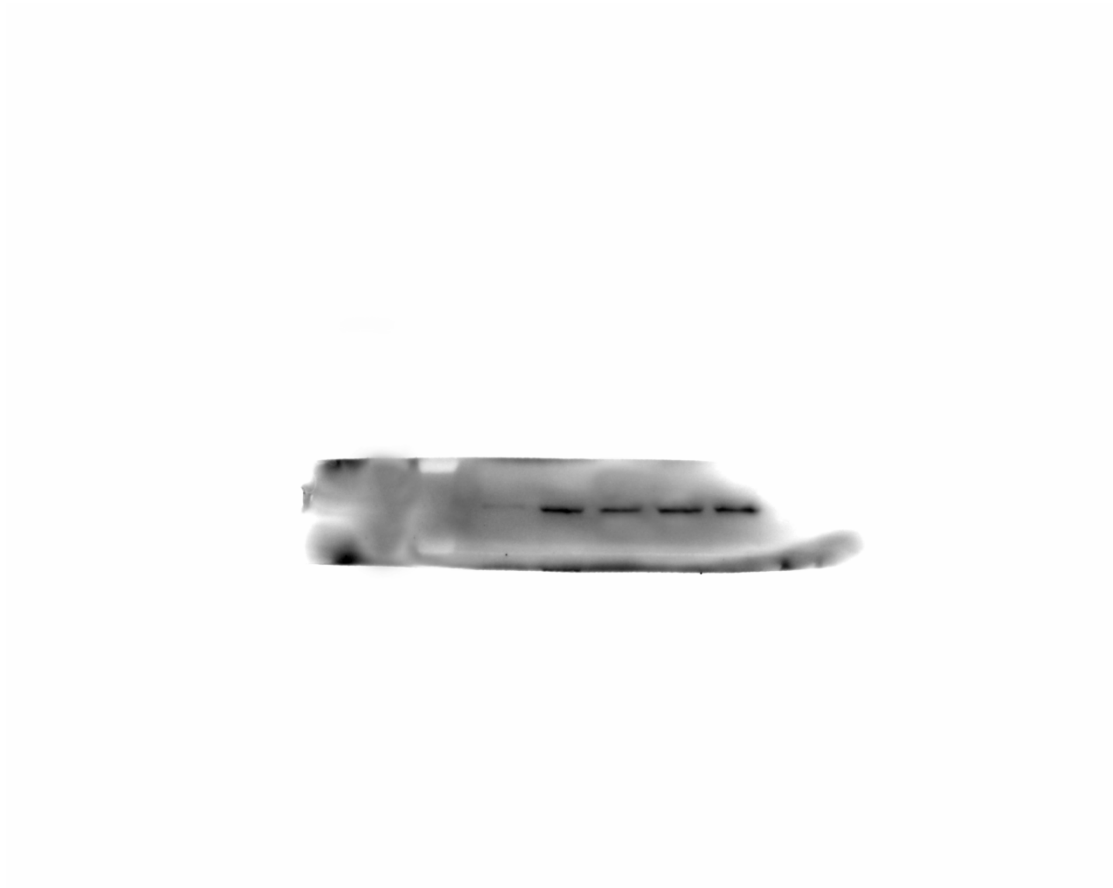

Cleaved caspase-9

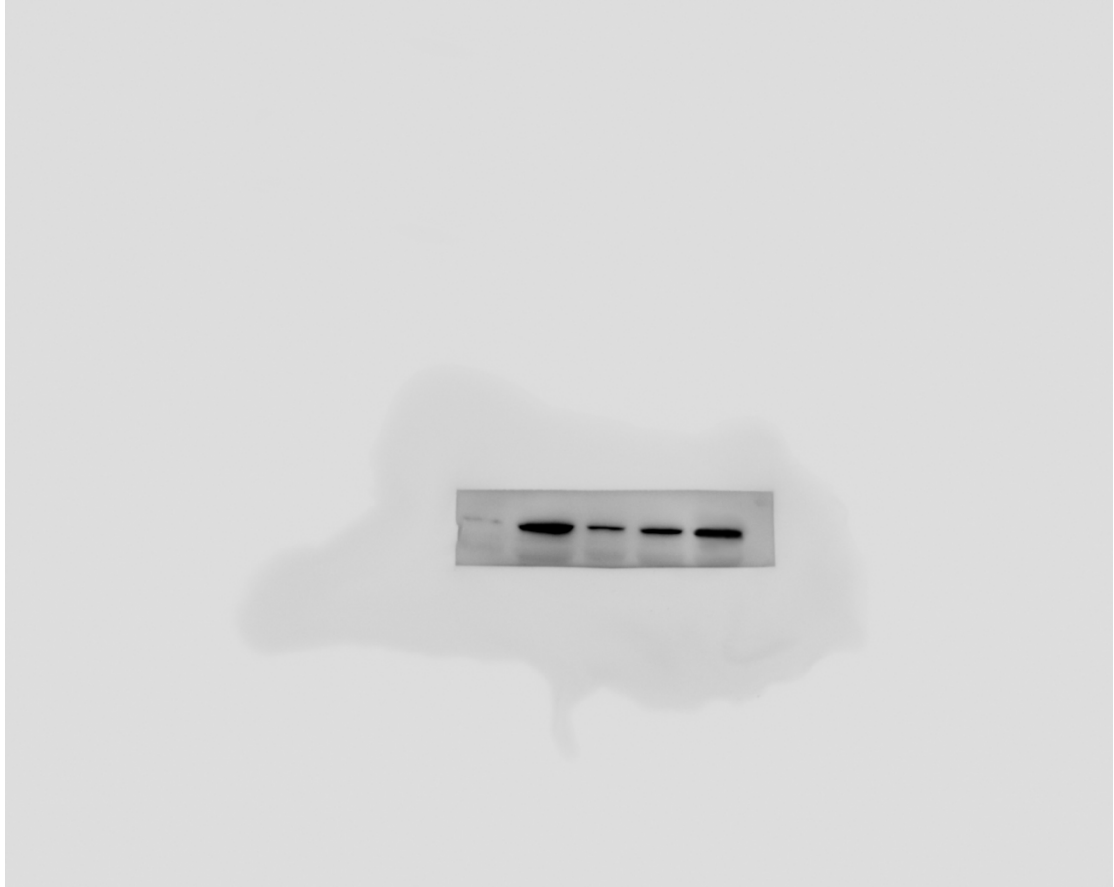

CHOP

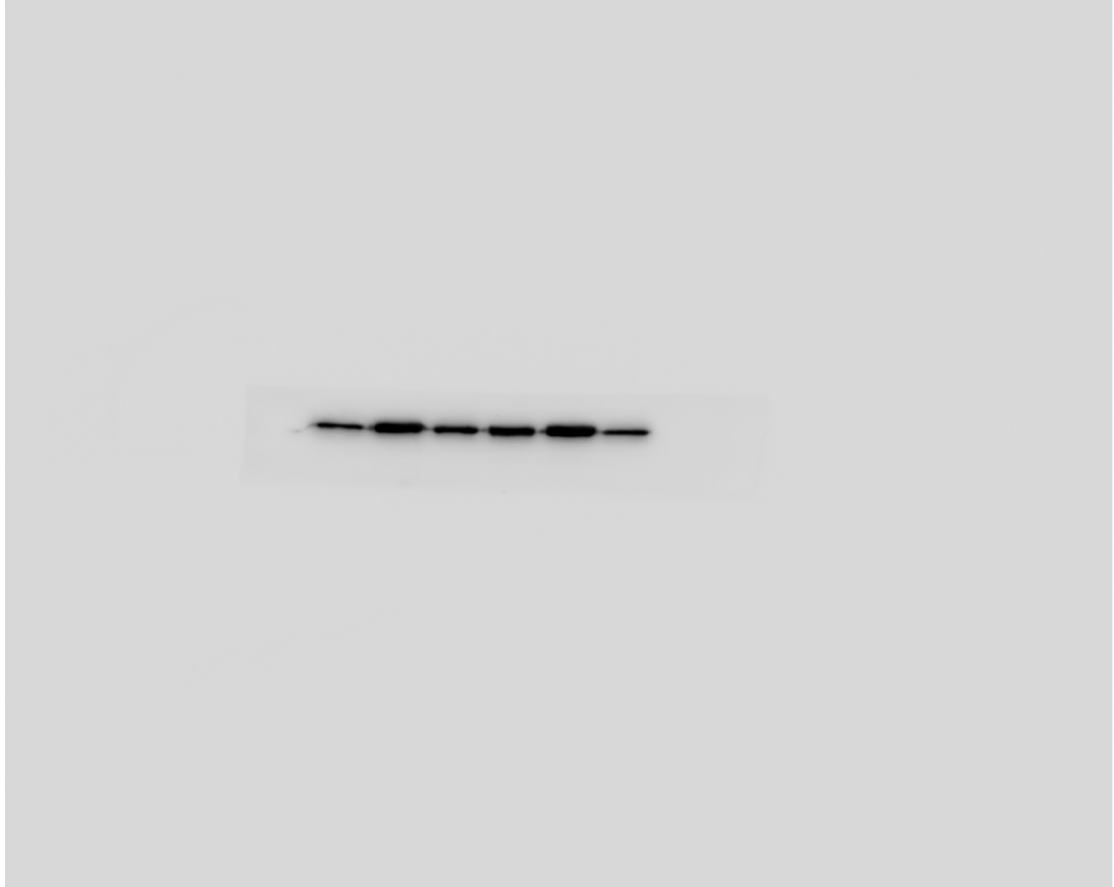

BIP

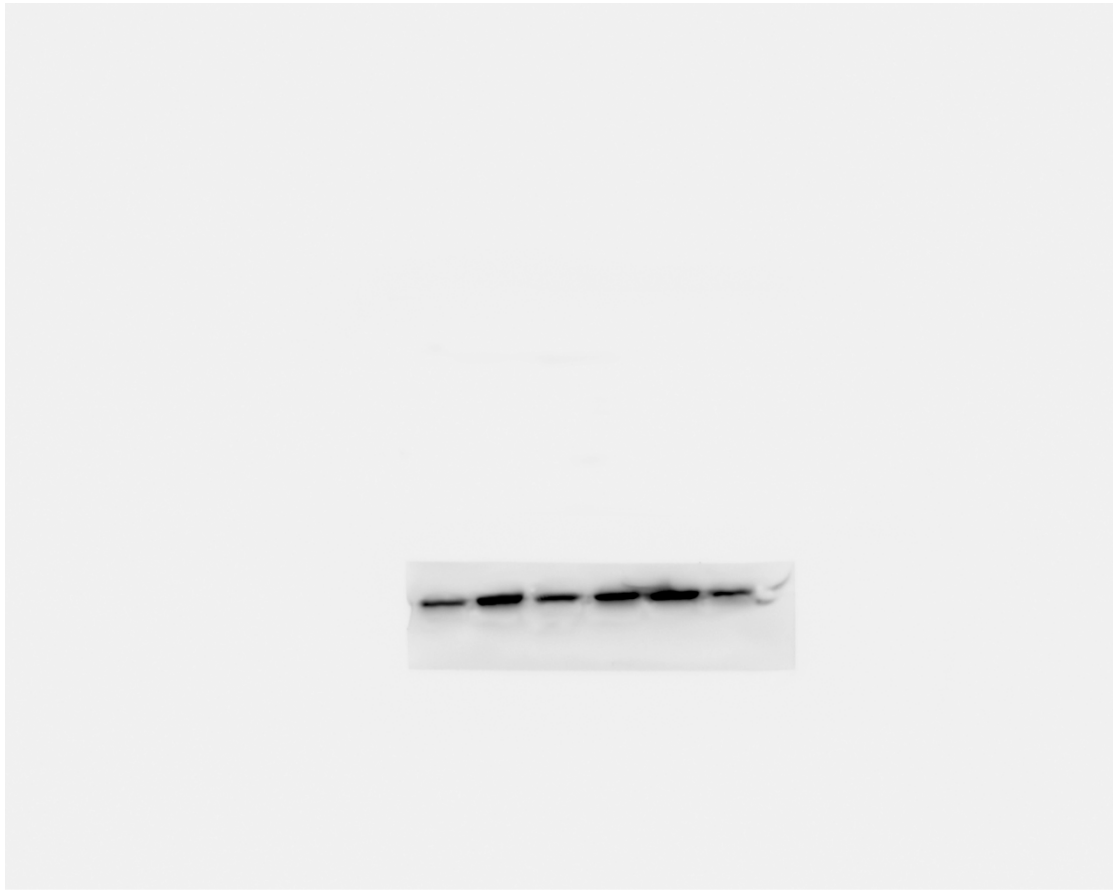

p-PERK

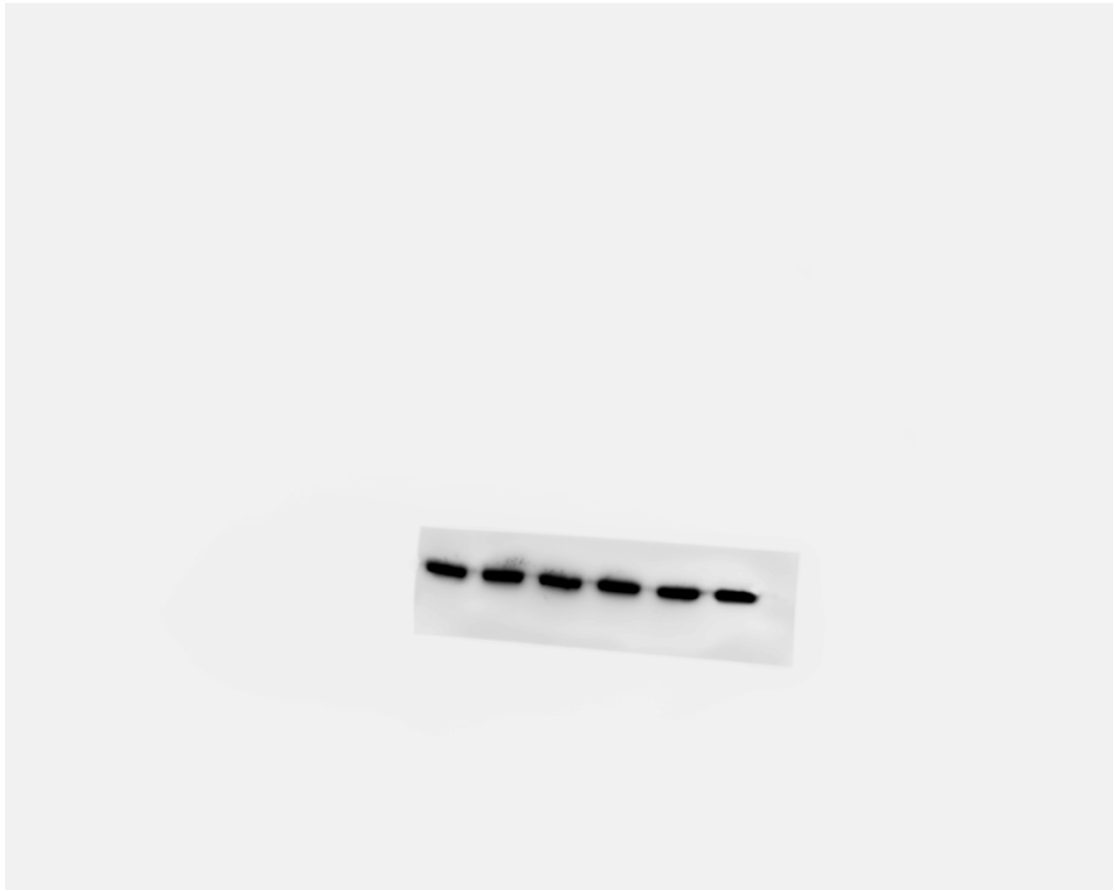

PERK

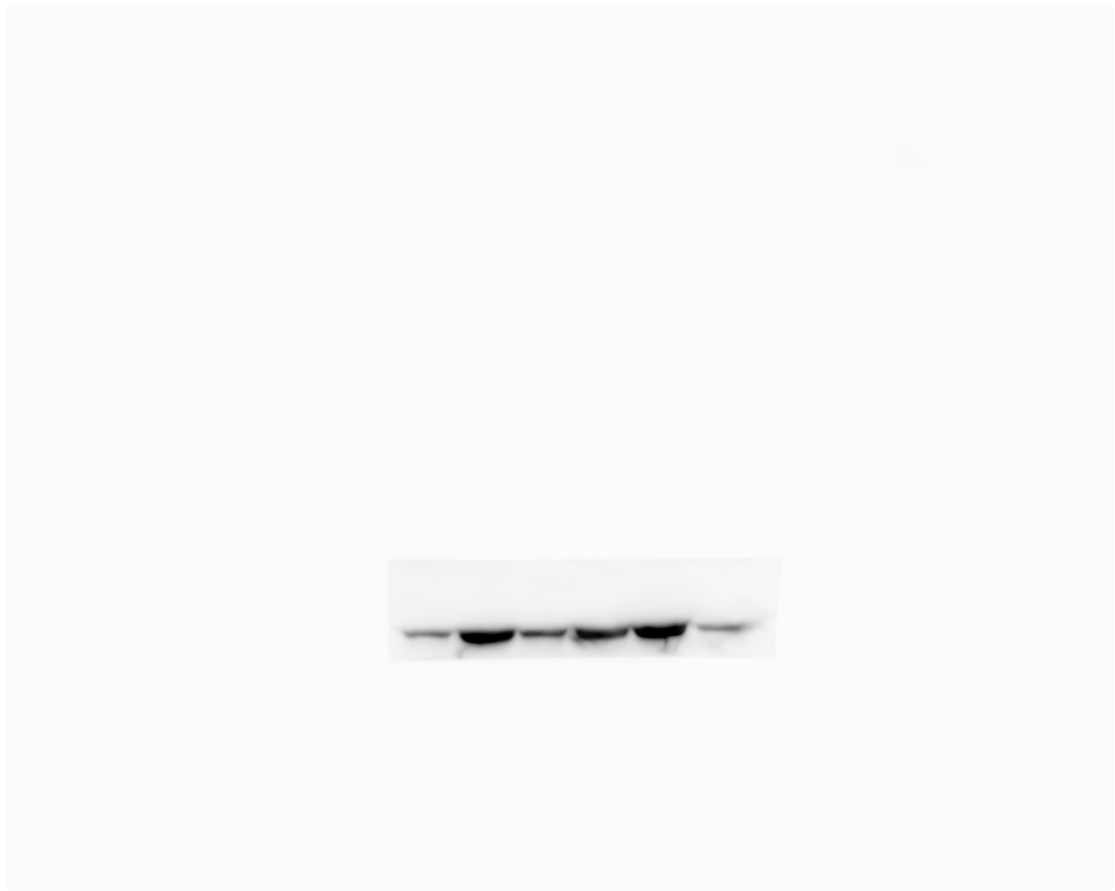

p-IRE1 $\alpha$

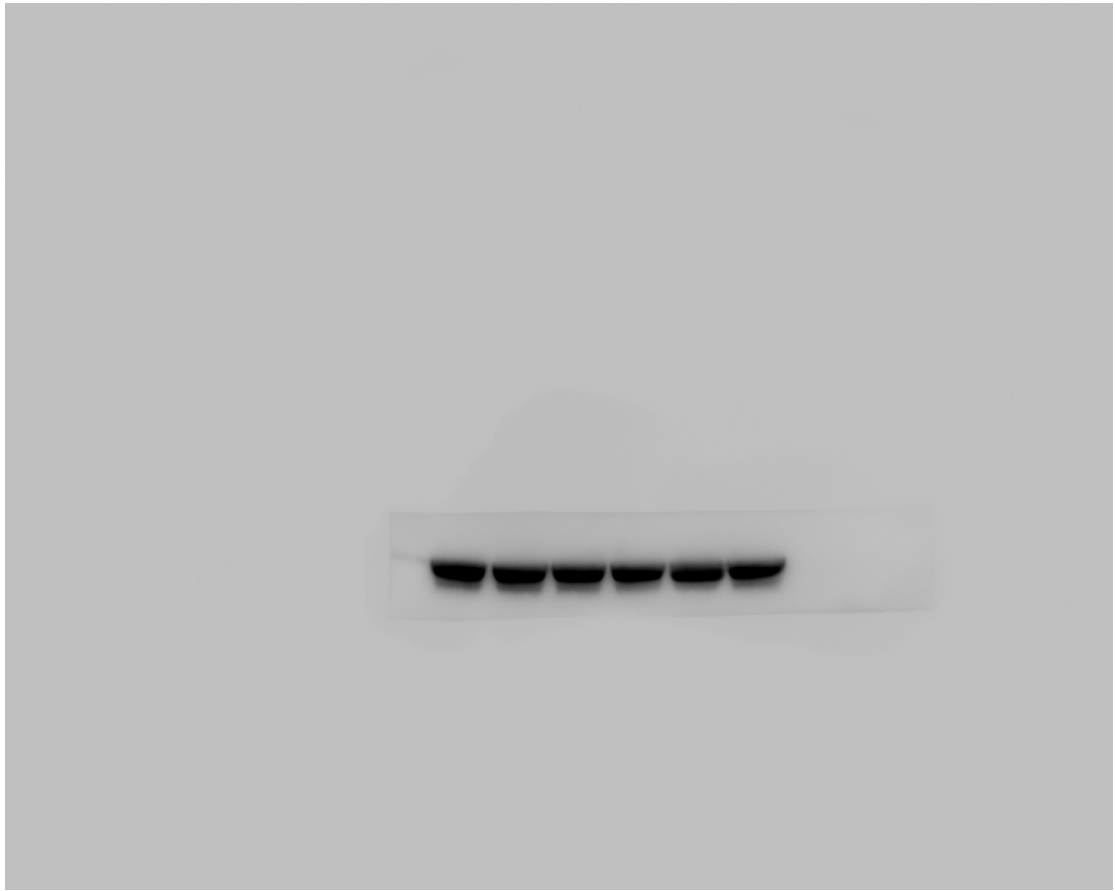

IRE1 $\alpha$



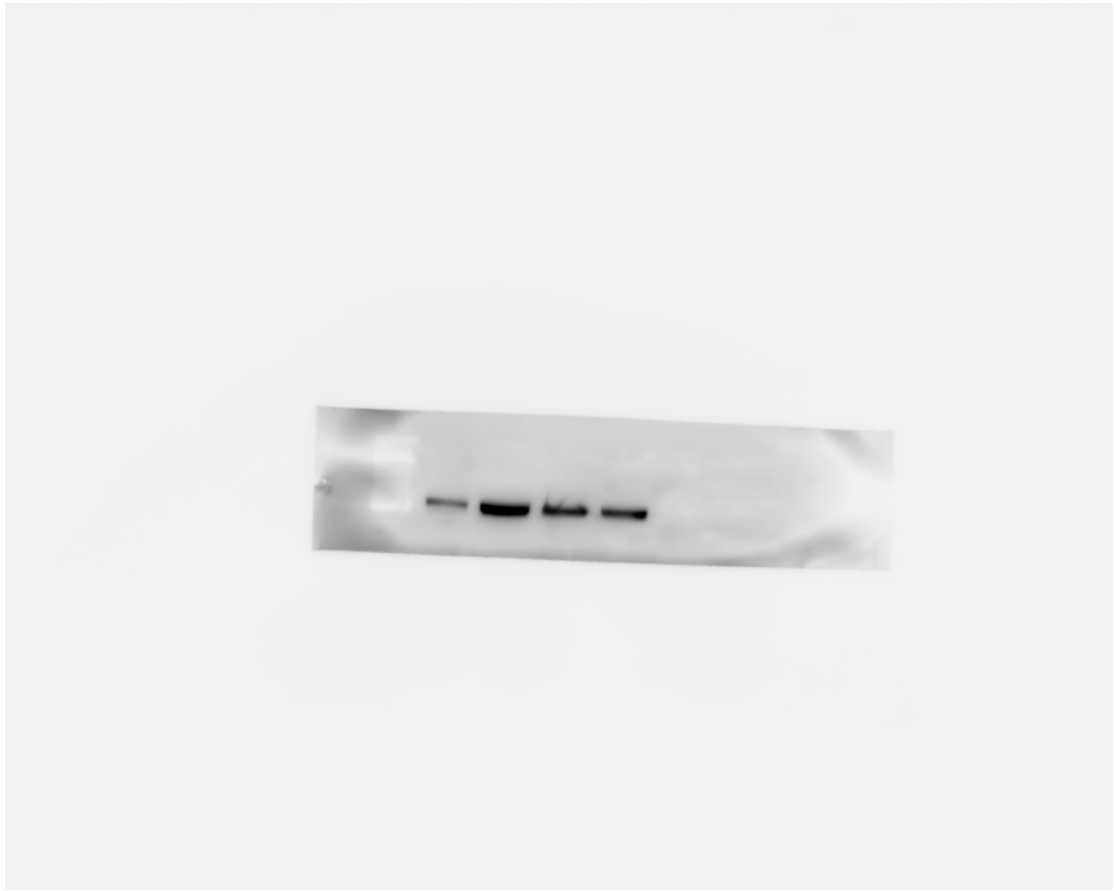

BIP

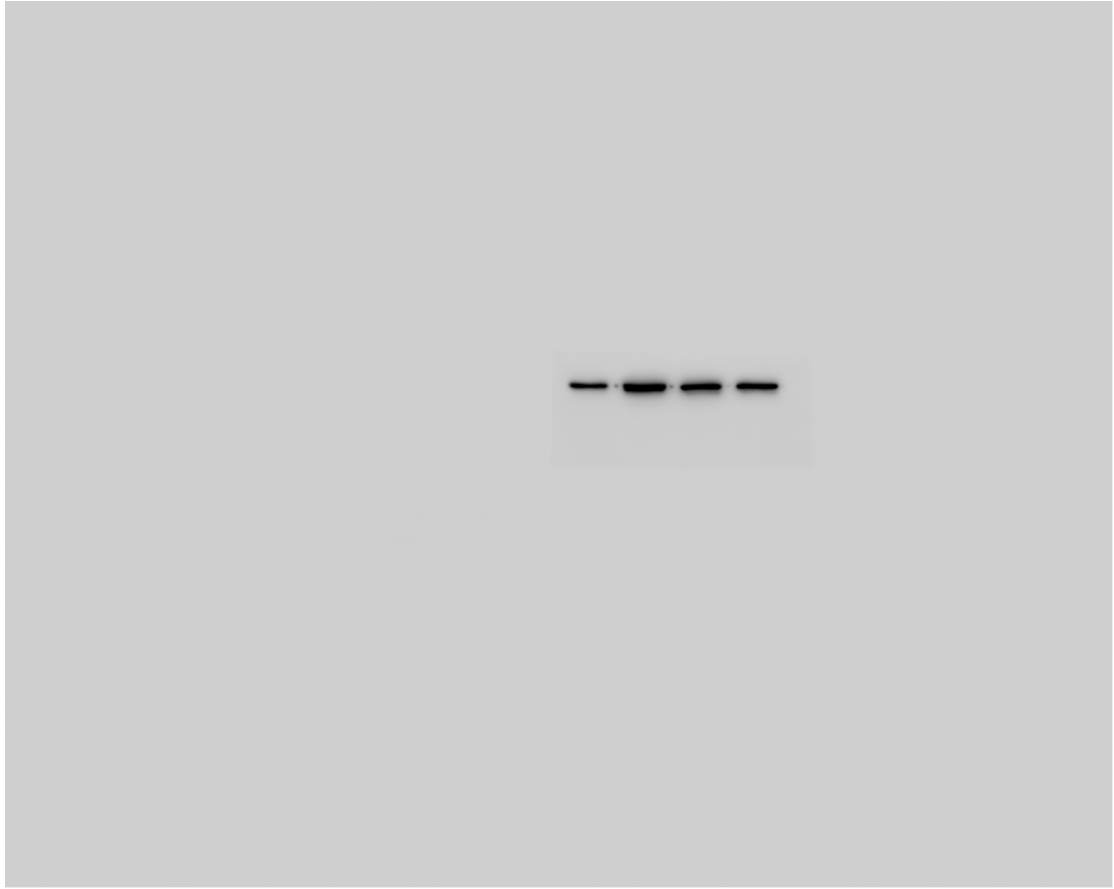

p-PERK

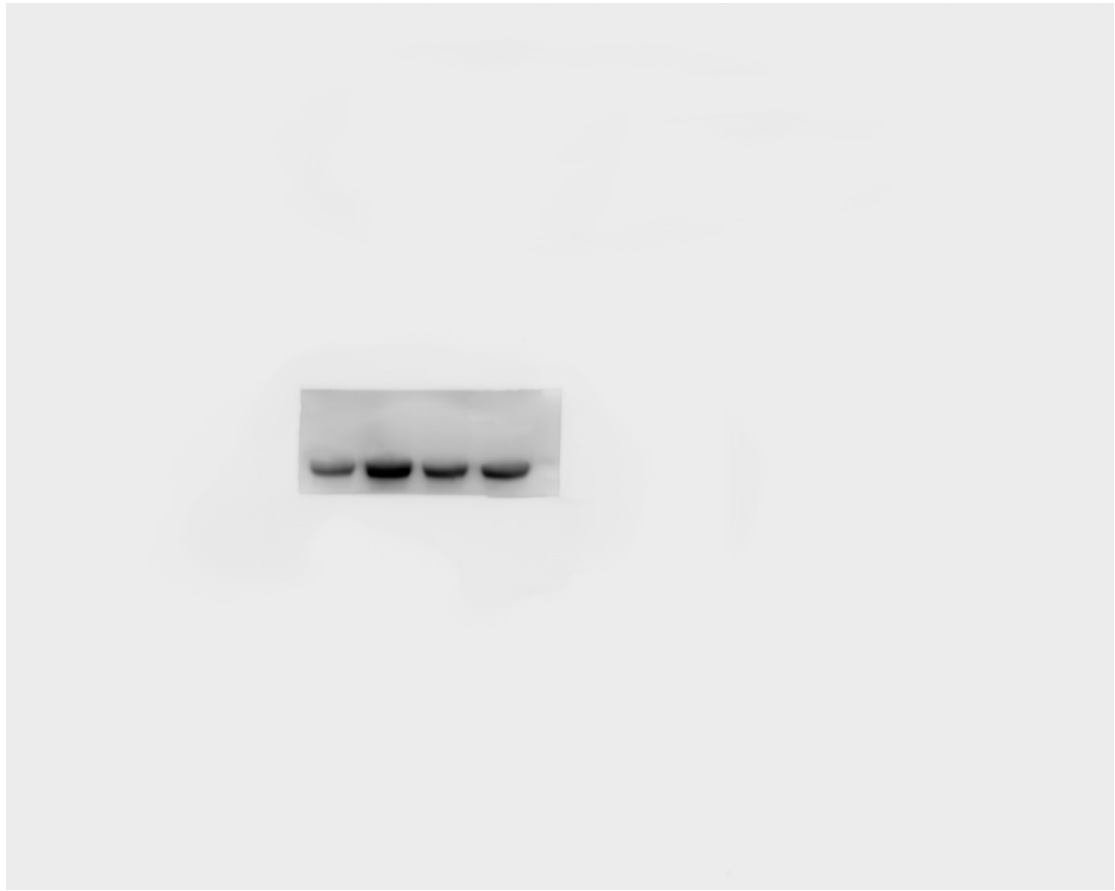

p-IRE1 $\alpha$

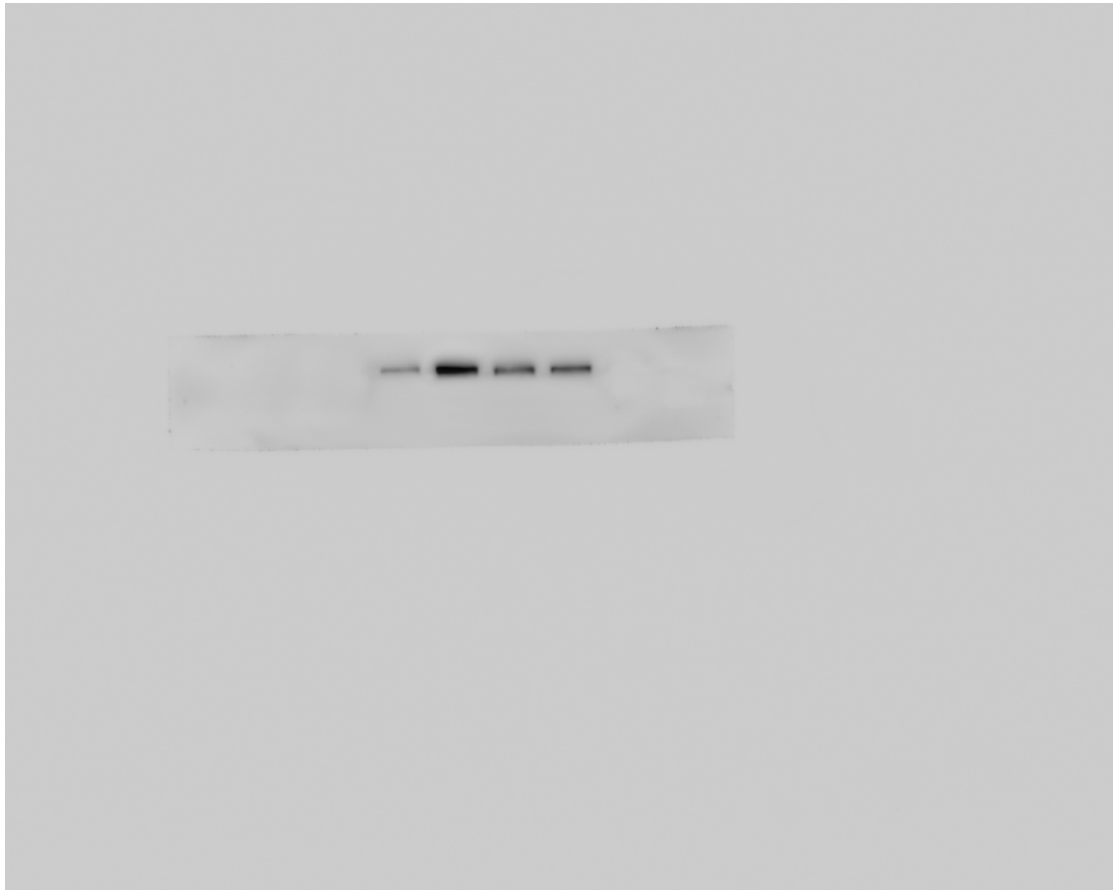

CHOP

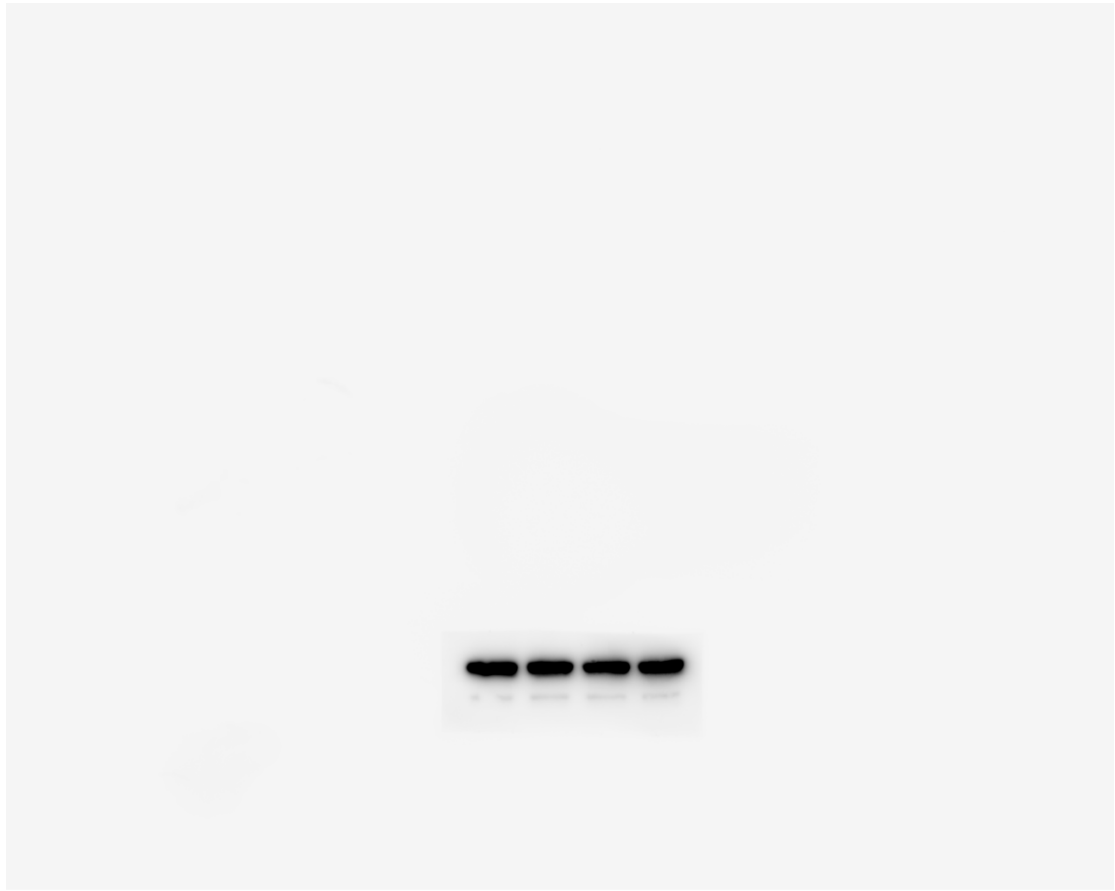

$\beta$ -actin

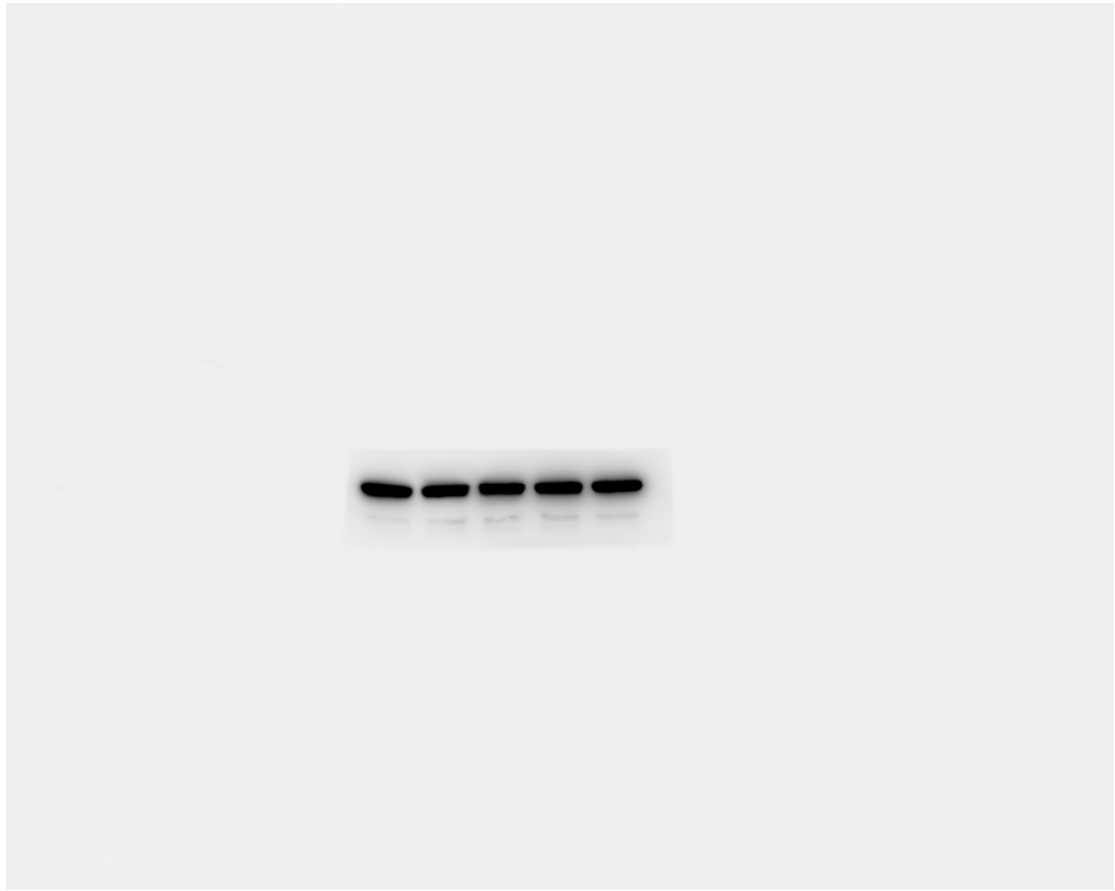

$\beta$ -actin

Fig S1. Representative original western blot image.

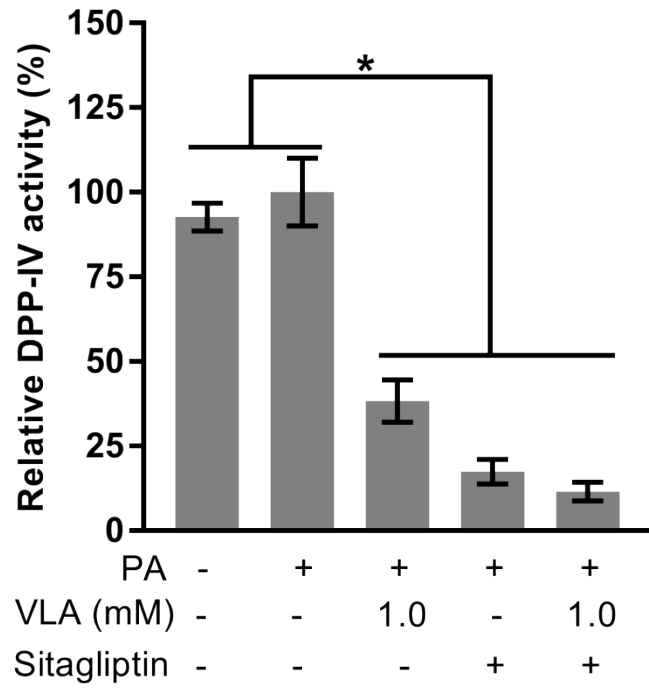

Fig S2. Relative DPP-IV activity of HepG2 cells was inhibited by VLA and sitagliptin.

## Control

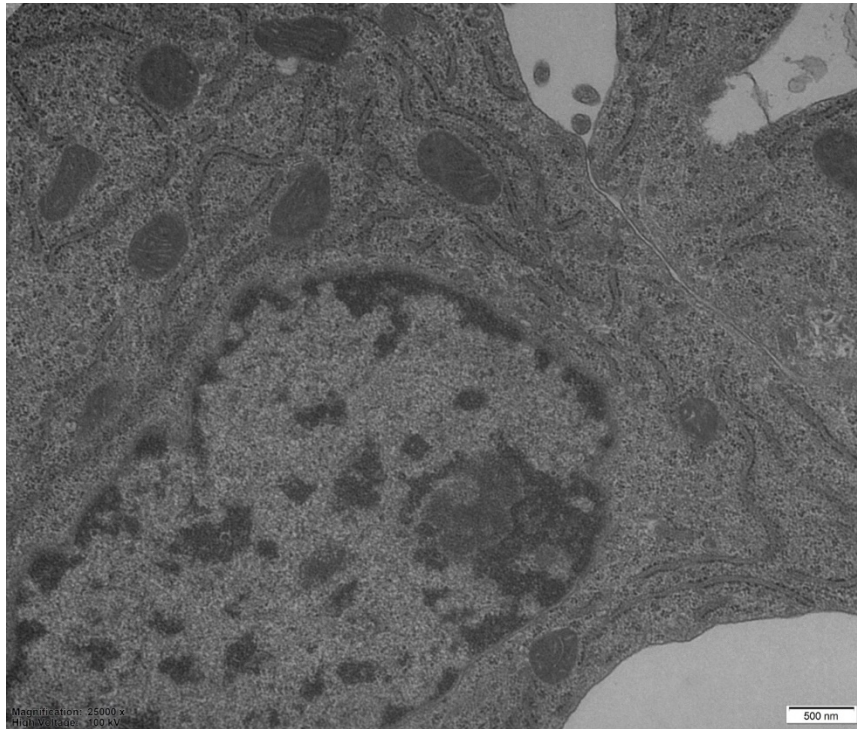

## PA

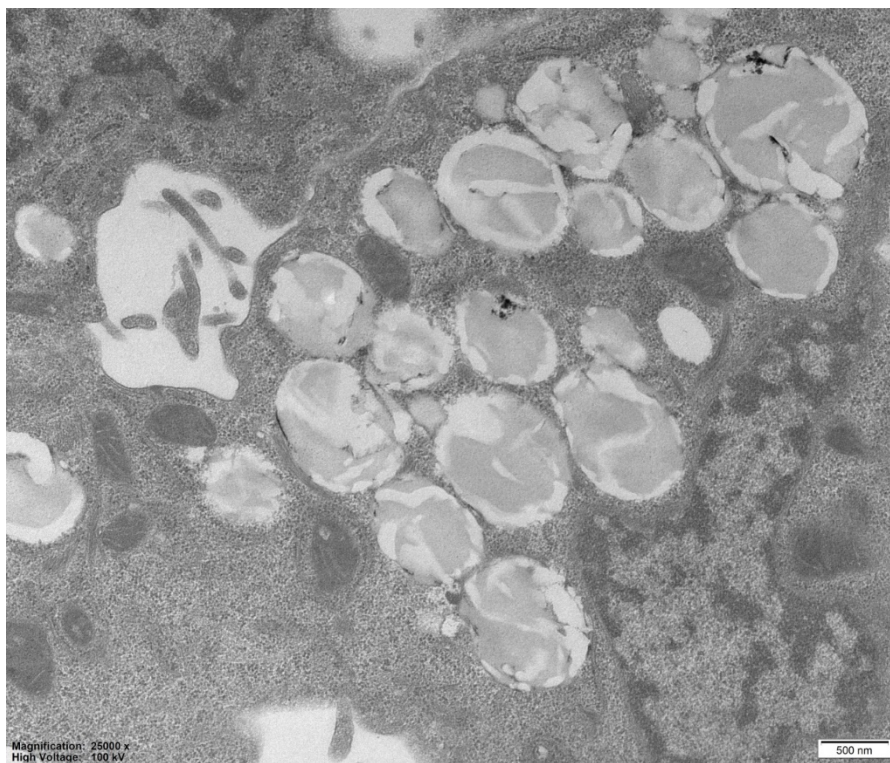



## 4-PBA

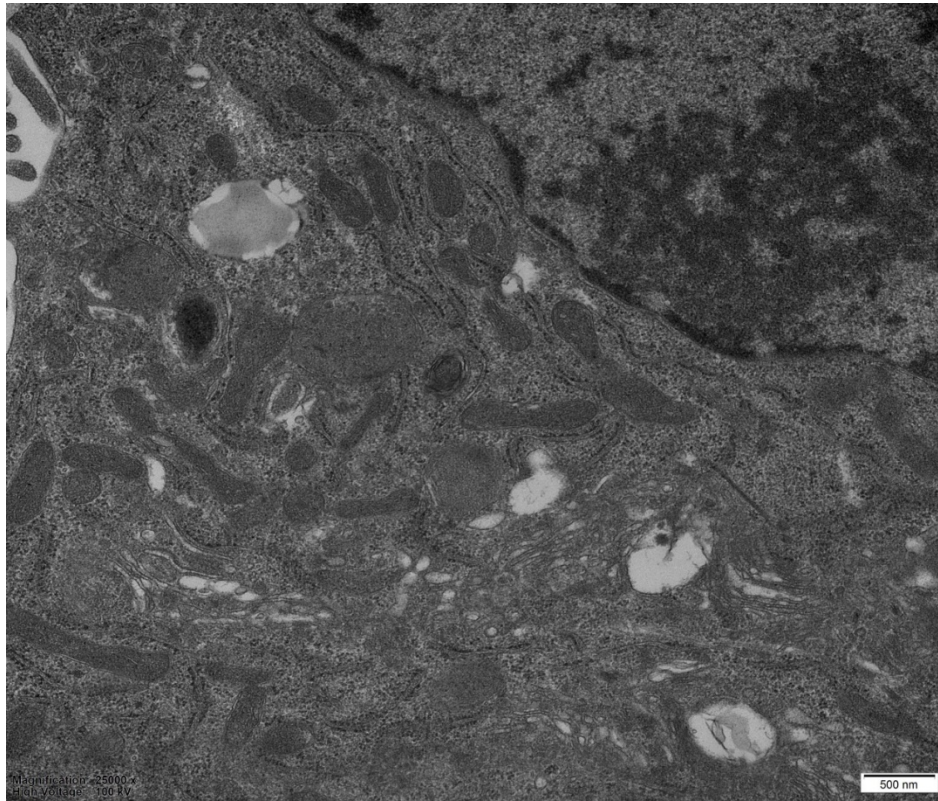

## 0.1 mM VLA

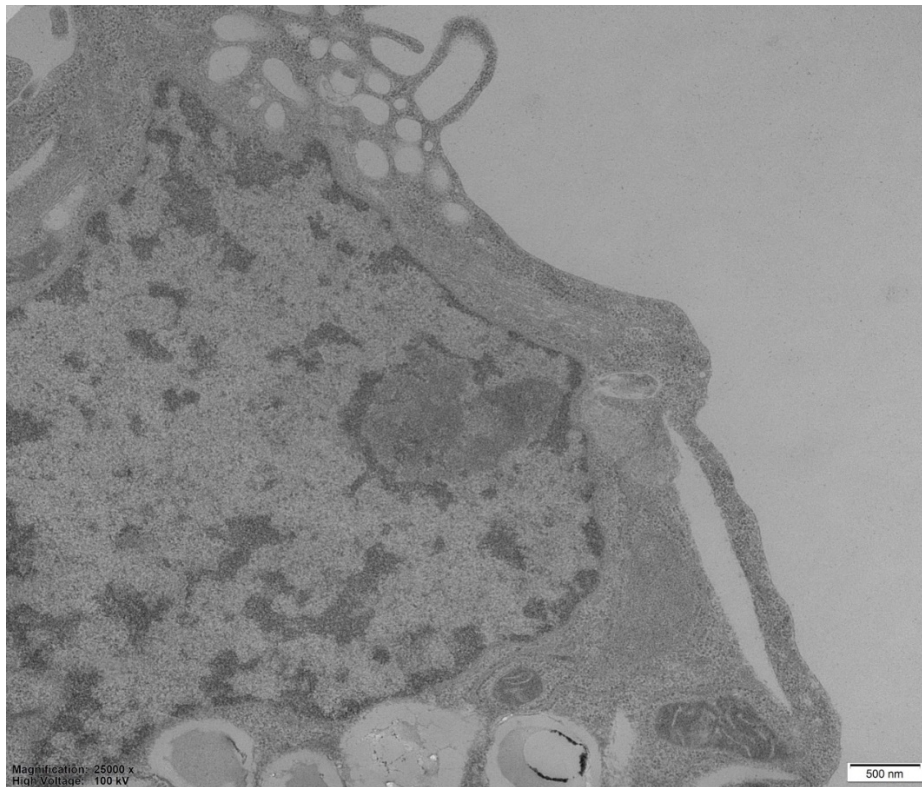

**0.5 mM VLA**

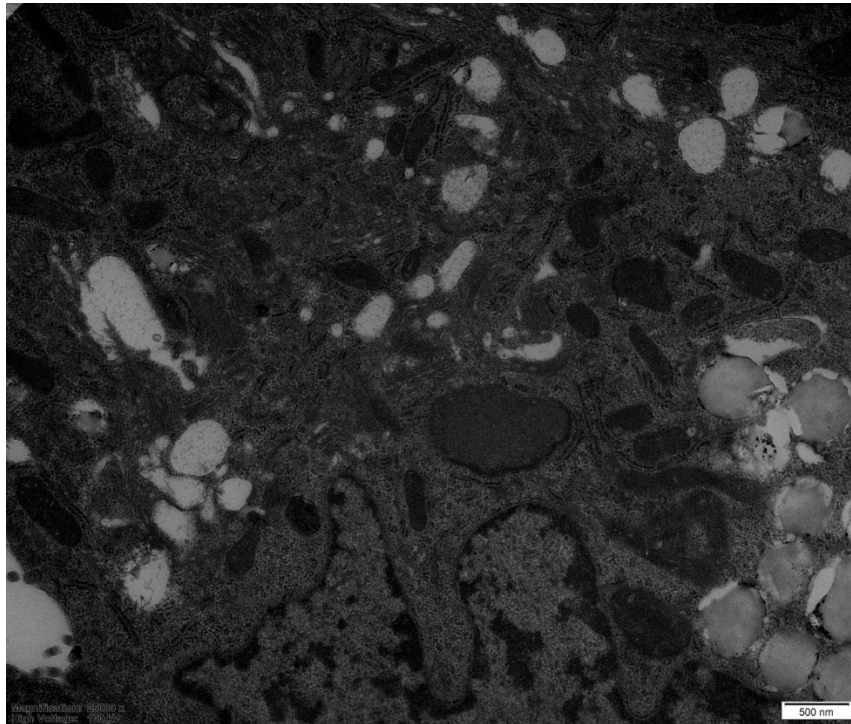

**1.0 mM VLA**

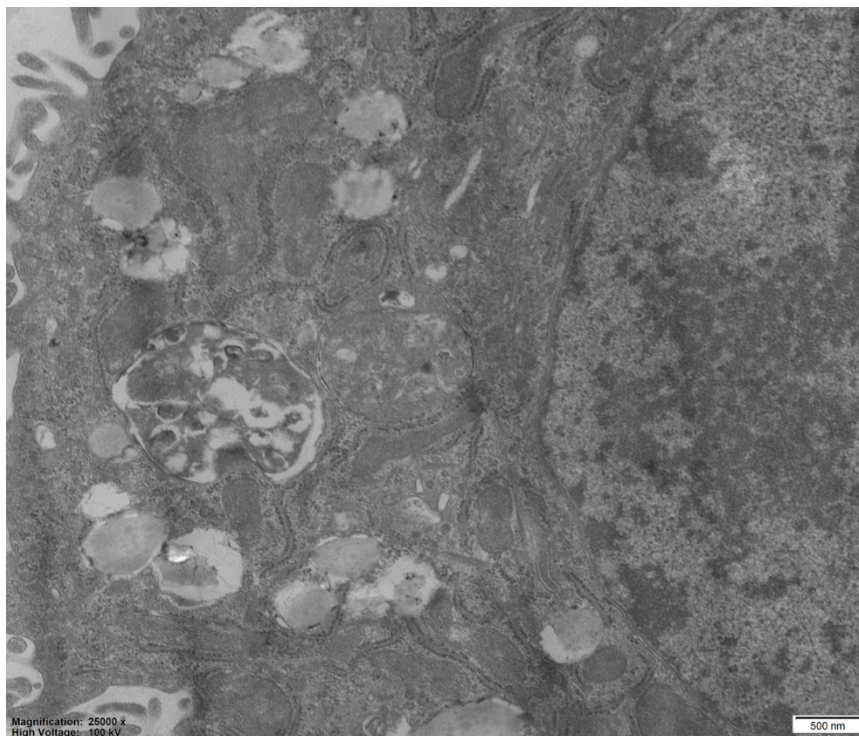

Fig S3. TEM images of the ER in HepG2 cells treated with medium (control), PA, 4-PBA or VLA (0.1-1.0 mM).
